# Supplementary material for: A Universal Multi-source Fusion Acceleration Sensor for Vibration Monitoring in Irregular Space
Source: Research Square preprint supplement (doi:10.21203/rs.3.rs-8049083/v1), 2025-11-19
Supplement: Supplementary file 2 [file dd973bdef52aa28c9680032b.docx]

**Highlights**

1. A multi-source fusion self-powered flexible acceleration sensor with symmetric structure is developed, which integrates two triboelectric and two electromagnetic modules is developed, and has mutual calibration ability for high-accuracy and reliable vibration monitoring.

2. A customized four-channel acquisition-storage circuit with linear fitting algorithm realizes reliable multi-source data fusion and state prediction.

3. This work offers a versatile sensing strategy for intelligent monitoring of human physiological and unmanned system operational states.
